# Supplementary material for: Microfluidically-unified cell culture, sample preparation, imaging and flow cytometry for measurement of cell signaling pathways with single cell resolution
Source: Royal Society of Chemistry journal article supplement (doi:10.1039/c2lc40344g), 2012-01-01
Supplement: c2lc40344g.pdf [file c2lc40344g.pdf]

| Level in TLR4 pathway              | Time                | Method                     | Protein Target   | Fluorophore | Excitation (nm) | Emission (nm) |
|------------------------------------|---------------------|----------------------------|------------------|-------------|-----------------|---------------|
| TLR4 receptor activation           | 0s, 30s, 30m        | Microscopy, flow cytometry | TLR4/MD2 complex | PE          | 488             | 585/42        |
| Intracellular MAPK phosphorylation | 0s, 30m             | Microscopy, flow cytometry | Phospho-ERK 1/2  | Alexa-647   | 635             | 670/20        |
| RelA-GFP translocation             | 0s to 2h continuous | Time-Lapse Microscopy      | RelA(P65)        | GFP         | 488             | 530/30        |
| Cytokine Production                | 0h, 4h              | Microscopy, flow cytometry | TNF- $\alpha$    | Cy5         | 635             | 660/20        |
