# Supplementary material for: Microfluidically-unified cell culture, sample preparation, imaging and flow cytometry for measurement of cell signaling pathways with single cell resolution
Source: Royal Society of Chemistry journal article supplement (doi:10.1039/c2lc40344g), 2012-01-01
Supplement: c2lc40344g_2.pdf [file c2lc40344g_2.pdf]

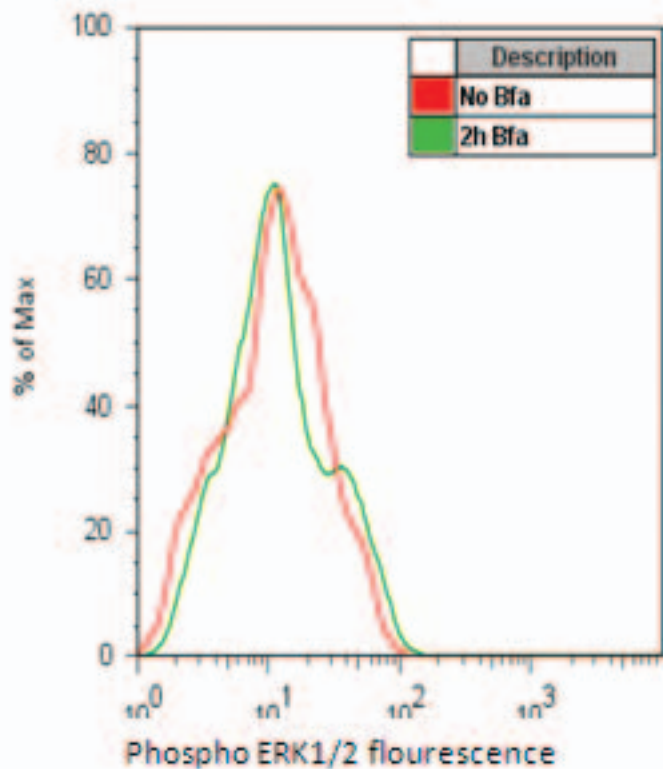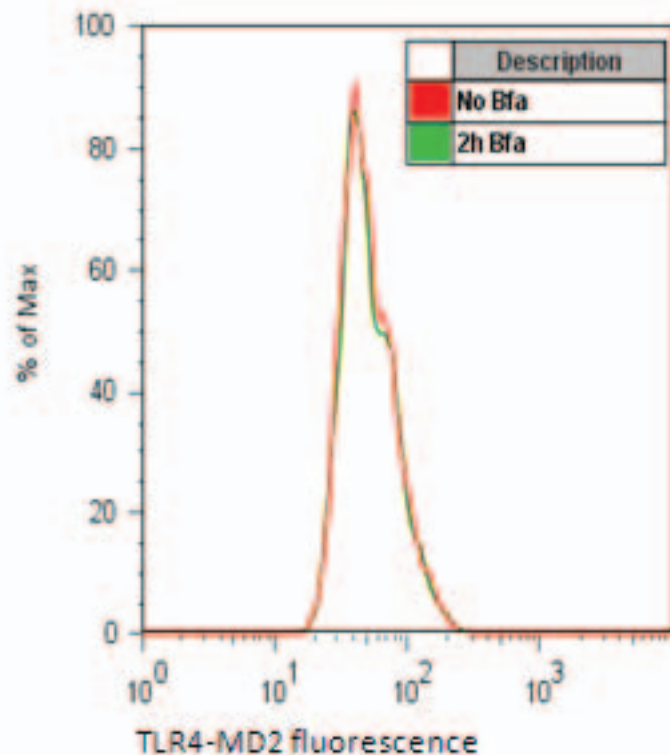

**Supplemental Figure 1.** Brefeldin A did not affect background level of ERK phosphorylation or the TLR4/MD2 complex.
