# Supplementary material for: Microfluidically-unified cell culture, sample preparation, imaging and flow cytometry for measurement of cell signaling pathways with single cell resolution
Source: Royal Society of Chemistry journal article supplement (doi:10.1039/c2lc40344g), 2012-01-01
Supplement: c2lc40344g_5.pdf [file c2lc40344g_5.pdf]

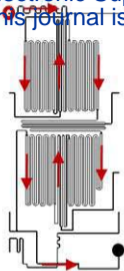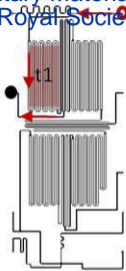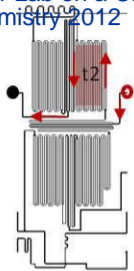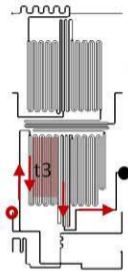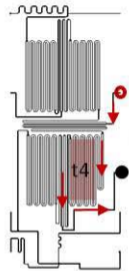

- Fluid inlet
- Fluid outlet
- Chamber with LPS
- Direction of flow

**Supplemental figure 4.** To perform the time course experiments, cells were driven into the chip by positive pressure from a port at the top of the chip (red circle) to the bottom (filled black circle), populating all 4 chambers. (A). Each chamber can be fluidically isolated and incubated with media containing LPS (B-E) for predetermined amount of time. Cells in each chamber were then fixed by flowing in 1.5% paraformaldehyde in PBS for 10 min, and all subsequent steps in sample preparation was done by flowing reagents from top left port to bottom right port as shown in A.
